# Supplementary material for: Low-temperature fabrication of Cu(i) sites in zeolites by using a vapor-induced reduction strategy
Source: Royal Society of Chemistry journal article supplement (doi:10.1039/c5ta02569a), 2015-01-01
Supplement: c5ta02569a1.pdf [file c5ta02569a1.pdf]

**Electronic Supplementary Information**

**Low-temperature fabrication of Cu(I) sites in zeolites by using a  
vapor-induced reduction strategy**

Ju-Xiang Qin, Zhi-Min Wang, Xiao-Qin Liu,\* Yu-Xia Li and Lin-Bing Sun\*

*State Key Laboratory of Materials-Oriented Chemical Engineering, College of Chemistry and  
Chemical Engineering, Nanjing Tech University, Nanjing 210009, China*

\*Corresponding author. E-mail: liuxq@njtech.edu.cn; lbsun@njtech.edu.cn.

## Experimental Section

### Materials.

Cu(II)Y zeolite was prepared by ion exchange of NaY with 0.5 mol/L  $\text{Cu}(\text{NO}_3)_2$  aqueous solution at 90 °C for 48 h. The amount of Cu(II) in the ion-exchange solution was equivalent to 5-fold cation-exchange capacity. After ion exchange, the zeolite suspension was filtered and the solid was washed thoroughly, followed by dried at 100 °C overnight.

The conversion of Cu(II)Y to Cu(I)Y was conducted by vapour-induced reduction (VIR). About 0.1 g Cu(II)Y was put in a open vial and kept inside an autoclave containing about 1 mL methanol ( $\text{CH}_3\text{OH}$ ) with no direct contact between the solid and the solution. The autoclave was then heated at 220 °C for 6 h. After the autoclave rapidly cooled to the room temperature, the vial with powder was taken out quickly, vacuumized by a Schlenk line to remove residual  $\text{CH}_3\text{OH}$ , and kept in the inert atmosphere. The obtained sample was denoted as Cu(I)Y-V.

For the autoreduction (AR) method, 0.1 g Cu(II)Y was treated in an Ar flow at 450 °C for 6 h with a heating rate of 2 °C  $\text{min}^{-1}$ . The resultant sample was denoted as Cu(I)Y-A.

### Characterization.

X-ray diffraction (XRD) patterns of the samples were recorded on a Bruker D8 Advance diffractometer with Cu  $K\alpha$  radiation in the  $2\theta$  range from 5° to 60° at 40 kV and 40 mA. The  $\text{N}_2$  adsorption-desorption isotherms were measured using an ASAP 2020 apparatus at -196 °C. Prior to analysis, the samples were evacuated at 200 °C for 4 h. The Brunauer-Emmett-Teller (BET) surface area was calculated at relative pressure ranging from 0.05 to 0.25. The total pore volume was derived from the amount adsorbed at a relative pressure of about 0.99.  $\text{H}_2$ -temperature programmed reduction (TPR) experiments were carried out on a BELSORP BEL-CAT-A apparatus. For Cu(I)Y-V, the sample were pressed into wafers, broken into small platelets (20-40 mesh) and pretreated at 150 °C under He for 3 h. After cooling to room temperature in the He atmosphere, the gas was switched to 10%  $\text{H}_2/\text{He}$  mixed gas (30 mL  $\text{min}^{-1}$ ). The sample was heated to 1000 °C at a rate of 10 °C  $\text{min}^{-1}$ .

X-ray photoelectron spectroscopy (XPS) analysis was conducted on a Physical Electronic PHI-550 spectrometer equipped with an Al K $\alpha$  X-ray source ( $h\nu=1486.6$  eV) operating at 10 kV and 35 mA. The mechanism of reaction was processed in a temperature-programmed apparatus equipped with a mass spectrometer (MS). The temperature of the sample was raised linearly at rate of 2 °C min<sup>-1</sup> from room temperature up to 600 °C. CH<sub>3</sub>OH was introduced into the sample by the means of Ar bubbling.

### **Gas adsorption test.**

Single component gases adsorption of propylene (C<sub>3</sub>H<sub>6</sub>) and propane (C<sub>3</sub>H<sub>8</sub>) were undertaken using an ASAP 2020 analyzer. The samples were degassed at 150 °C for 3 h before analysis, then the sample was back-filled with nitrogen and transferred to the analysis system. Free space was measured using helium (99.999%), assuming that the helium is not adsorbed at the studied temperature. Adsorption isotherms of C<sub>3</sub>H<sub>6</sub> and C<sub>3</sub>H<sub>8</sub> at 298 K were measured in a water bath.

The adsorption selectivity of propylene over propane on Cu(I)Y can be defined as  $S_{ij} = (x_i/y_i)/(x_j/y_j)$ , where  $x_i$  and  $x_j$  are the equilibrated adsorption capacities of components propylene and propane respectively, and  $y_i$  and  $y_j$  are the molar fractions of components of propylene and propane in gas phases respectively. For the pure propylene and propane adsorption, Dual-Site Langmuir mode (DL) model was chosen to fit their adsorption isotherms. Considering the ideal adsorption solution theory (IAST) can accurately describe gas-mixtures adsorption, the DL-IAST was employed to predict binary gas mixture adsorption on various materials.

**Table S1.** Structural properties, Cu content, and adsorption performances of samples.

| Adsorbent | $S_{\text{BET}}$<br>( $\text{m}^2 \text{g}^{-1}$ ) | $V_{\text{p}}$<br>( $\text{cm}^3 \text{g}^{-1}$ ) | Cu content <sup>a</sup><br>(%) |        | Adsorbed amount <sup>b</sup><br>(mmol/g) |         |
|-----------|----------------------------------------------------|---------------------------------------------------|--------------------------------|--------|------------------------------------------|---------|
|           |                                                    |                                                   | Cu(I)                          | Cu(II) | Propylene                                | Propane |
| NaY       | 726                                                | 0.35                                              | –                              | –      | 3.67                                     | 3.16    |
| Cu(II)Y   | 661                                                | 0.34                                              | 0                              | 100    | 3.83                                     | 2.58    |
| Cu(I)Y-A  | 624                                                | 0.32                                              | 41.5                           | 58.5   | 4.12                                     | 2.54    |
| Cu(I)Y-V  | 598                                                | 0.33                                              | 86.3                           | 13.7   | 4.15                                     | 1.32    |

<sup>a</sup> Calculated from XPS results. <sup>b</sup> Measured at 298 K and 1 atm..

**Table S2.** Fitting parameters derived from isothermal data at 25 °C.

| Adsorbent | Adsorbate | $q_c$<br>(mmol/g) | $q_i$<br>(mmol/g) | $K_c$<br>( $\text{atm}^{-1}$ ) | $K_i$<br>( $\text{atm}^{-1}$ ) | $R^2$  |
|-----------|-----------|-------------------|-------------------|--------------------------------|--------------------------------|--------|
| NaY       | Propylene | 1.0770            | 2.6040            | 14.6750                        | 1562.9120                      | 0.9992 |
|           | Propane   | 3.0456            | 2.8188            | 46.0693                        | 0.0664                         | 0.9998 |
| Cu(II)Y   | Propylene | 1.1813            | 2.6983            | 7.5004                         | 832.3938                       | 0.9976 |
|           | Propane   | 2.5028            | 532.6053          | 29.0025                        | 0.0003                         | 0.9984 |
| Cu(I)Y-A  | Propylene | 1.1190            | 3.0950            | 5.8120                         | 1027.1330                      | 0.9984 |
|           | Propane   | 2.4488            | 824.2950          | 25.1506                        | 0.0002                         | 0.9996 |
| Cu(I)Y-V  | Propylene | 1.0361            | 3.1318            | 7.4378                         | 930.1153                       | 0.9982 |
|           | Propane   | 1.0674            | 1.3693            | 42.1972                        | 0.2516                         | 0.9998 |

**Table S3.** Adsorbed amount of propylene and propane for some adsorbents.

| Adsorbent                                        | Adsorbed amount (mmol/g) |         | Equilibrium Selectivity  | Reference |
|--------------------------------------------------|--------------------------|---------|--------------------------|-----------|
|                                                  | Propylene                | Propane |                          |           |
| Cu(I)Y-V                                         | 4.15                     | 1.32    | 3.14                     | This work |
| 13X                                              | 2.6                      | 2.2     | 1.18                     | 1         |
| Li-exchanged 13X                                 | 2.5                      | 2.0     | 1.25                     | 2         |
| 5A                                               | 2.5                      | 2.0     | 1.25                     | 1         |
| Activated carbon                                 | 5.2                      | 4.5     | 1.15                     | 1         |
| Silica gel                                       | 2.0                      | 1.4     | 1.43                     | 3         |
| SBA-15                                           | 1.3                      | 1.2     | 1.08                     | 4         |
| CuCl/NaX                                         | 1.9                      | 1.4     | 1.36                     | 5         |
| CuCl/ $\gamma$ -Al <sub>2</sub> O <sub>3</sub>   | 0.7                      | 0.2     | 3.50                     | 6         |
| SiAl <sub>20</sub> Cu <sub>5</sub> <sup>a</sup>  | 1.8                      | 1.2     | 1.50                     | 7         |
| SiAl <sub>20</sub> Cu <sub>20</sub> <sup>a</sup> | 0.9                      | 0.6     | 1.50                     | 7         |
| CuA <sub>10</sub> B <sub>1</sub> <sup>b</sup>    | 1.6                      | 0.9     | 1.78 (10.4) <sup>c</sup> | 8         |
| CuA <sub>2</sub> B <sub>1</sub> <sup>b</sup>     | 3.9                      | 3.0     | 1.30 (2.7) <sup>c</sup>  | 8         |

<sup>a</sup> Cylindrically shaped aluminosilicates with a Si:Al molar ratio of 20 modified with copper loading of 5 % and 20 %; <sup>b</sup> Cu-functionalized porous organic polymer (POP) by adjusting the molar ratios of monomers 1,4-diethynyl-2,3-dihydroxybenzene (A) and Td-directing tetrakis (4-ethynyl) methane (B) with 10 : 1 and 2 : 1, respectively. <sup>c</sup> The values in parentheses are IAST selectivity.

## References

- 1 H. Jarvelin and J. R. Fair, *Ind. Eng. Chem. Res.*, 1993, **32**, 2201.
- 2 C. A. Grande, J. Gascon, F. Kapteijn and A. E. Rodrigues, *Chem. Eng. J.*, 2010, **160**, 207.
- 3 C. A. Grande and A. E. Rodrigues, *Ind. Eng. Chem. Res.*, 2001, **40**, 1686.
- 4 C. A. Grande, J. D. Araujo, S. Cavenati, N. Firpo, E. Basaldella and A. E. Rodrigues, *Langmuir*, 2004, **20**, 5291.

- 5 A. van Miltenburg, J. Gascon, W. Zhu, F. Kapteijn and J. A. Moulijn, *Adsorption*, 2008, **14**, 309.
- 6 R. Yang and E. Kikkinides, *AlChE J.*, 1995, **41**, 509.
- 7 M. Kargol, J. Zajac, D. Jones, J. Rozière, T. Steriotis, A. Jiménez-López and E. Rodríguez-Castellón, *Chem. Mater.*, 2005, **17**, 6117.
- 8 M. H. Weston, Y. J. Colón, Y.-S. Bae, S. J. Garibay, R. Q. Snurr, O. K. Farha, J. T. Hupp and S. T. Nguyen, *J. Mater. Chem. A*, 2014, **2**, 299.

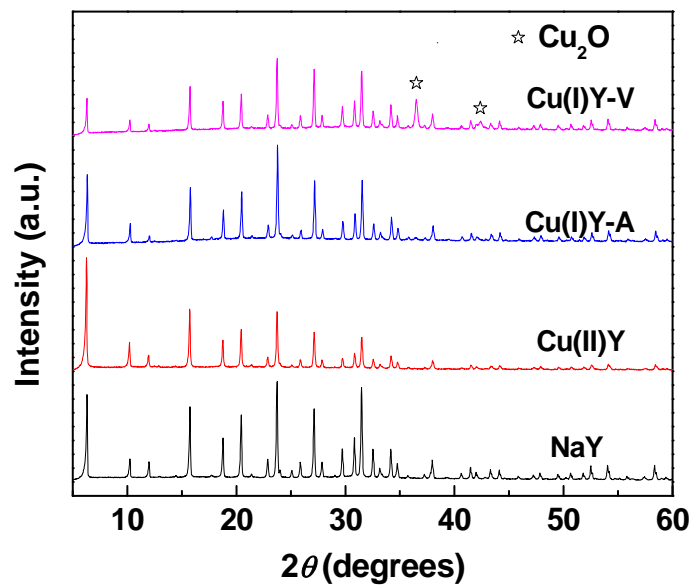

**Figure S1.** XRD patterns of NaY, Cu(II)Y, Cu(I)Y-A, and Cu(I)Y-V samples.

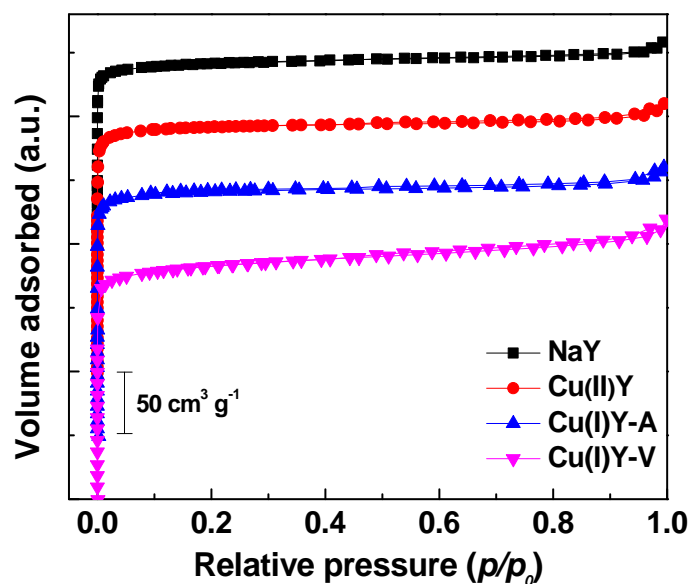

**Figure S2.** N<sub>2</sub> adsorption-desorption isotherms of NaY, Cu(II)Y, Cu(I)Y-A, and Cu(I)Y-V samples. Curves are plotted offset for clarity.

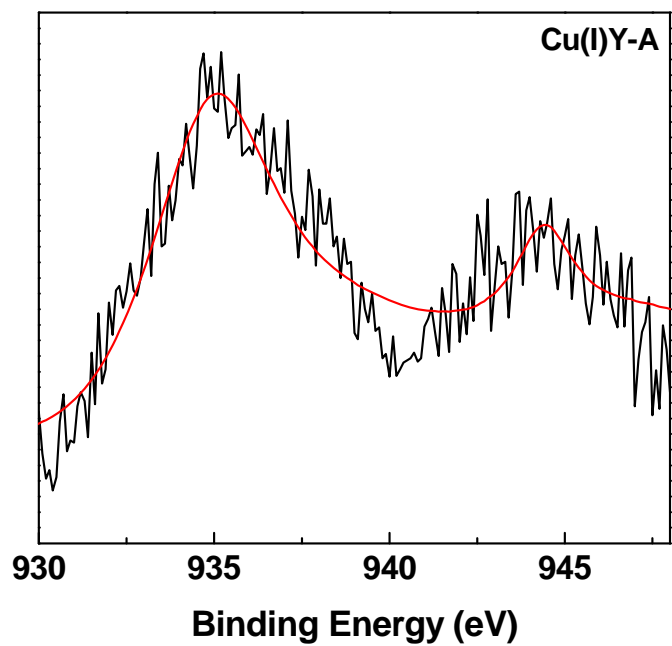

**Figure S3.** XPS spectra of Cu  $2p_{3/2}$  for Cu(I)Y-A.

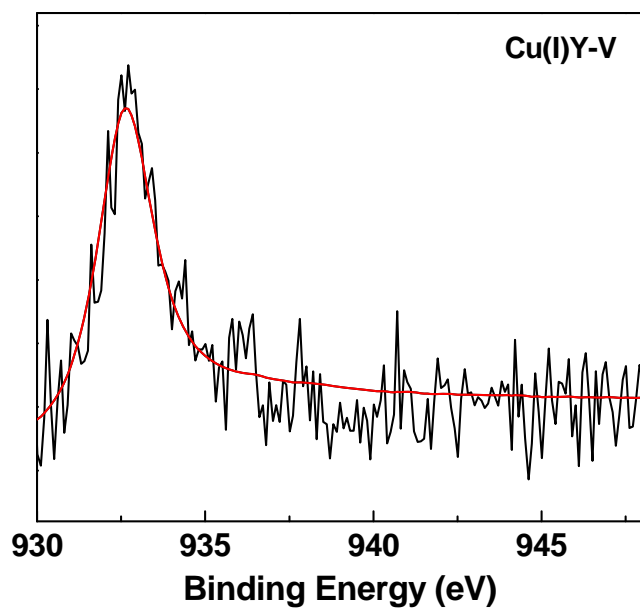

**Figure S4.** XPS spectra of Cu  $2p_{3/2}$  for Cu(I)Y-V.



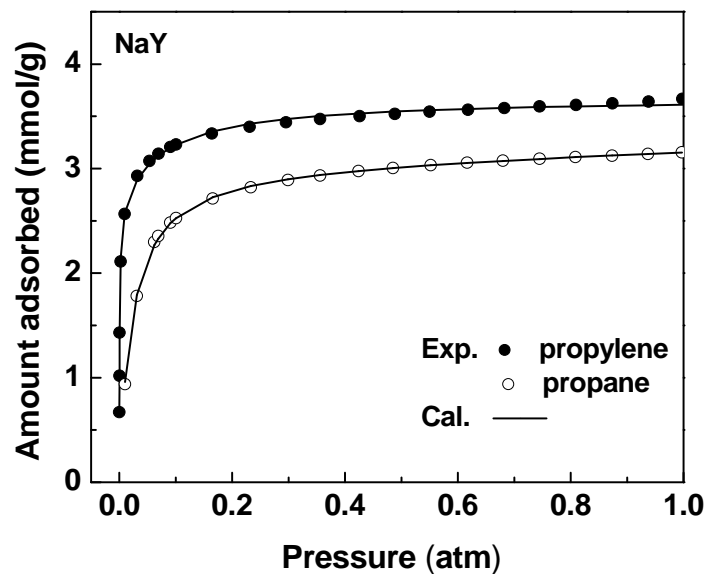

Figure S5. Adsorption isotherms of propylene and propane on NaY.

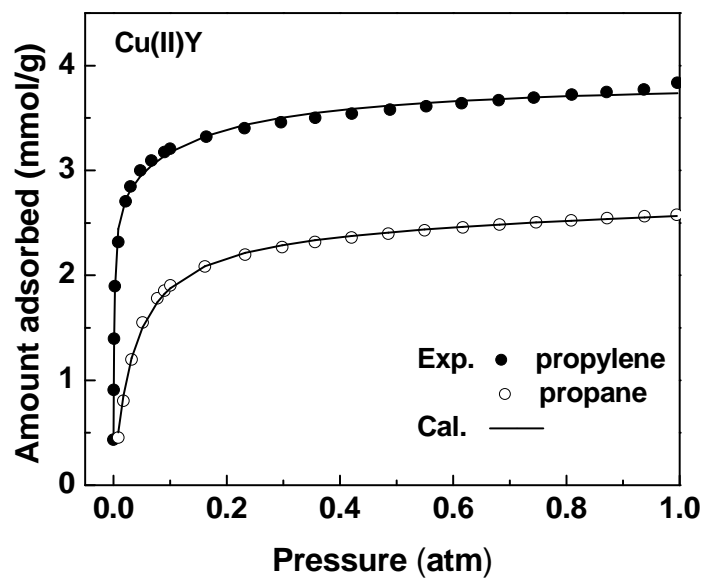

Figure S6. Adsorption isotherms of propylene and propane on Cu(II)Y.

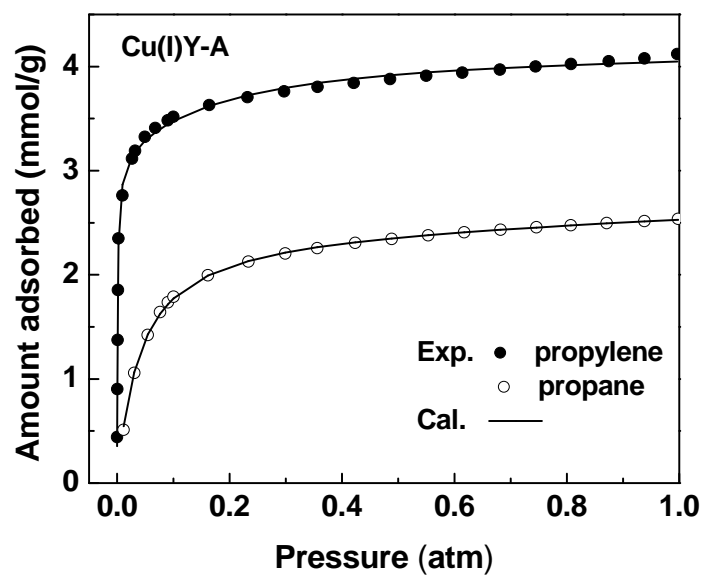

**Figure S7.** Adsorption isotherms of propylene and propane on Cu(I)Y-A.

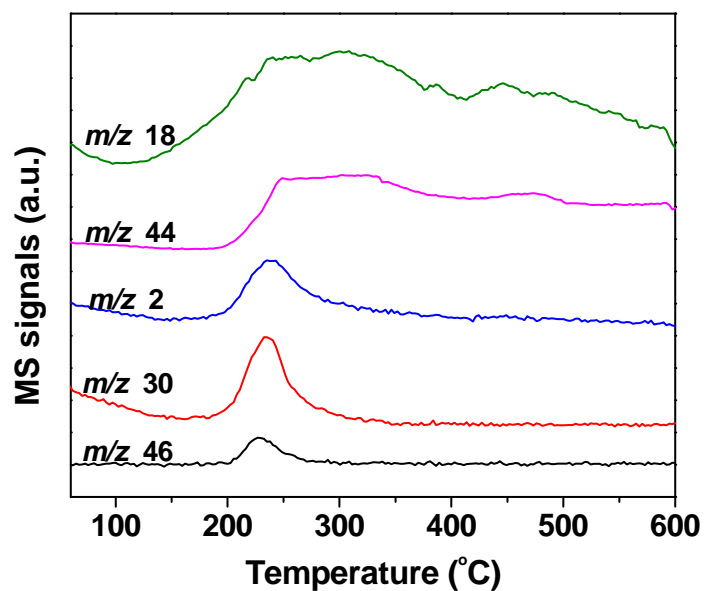

**Figure S8.** MS-monitored temperature programmed reaction of methanol vapor with Cu(II)Y.
